# Supplementary material for: PE-ALD of Ge1−xSxamorphous chalcogenide alloys for OTS applications
Source: Royal Society of Chemistry journal article supplement (doi:10.1039/d1tc00650a), 2021-01-01
Supplement: d1tc00650a1.pdf [file d1tc00650a1.pdf]

## PE-ALD of $\text{Ge}_{1-x}\text{S}_x$ amorphous chalcogenide alloys for OTS applications

Myoungsub Kim<sup>a, b</sup>, Youngjun Kim<sup>a</sup>, Minkyu Lee<sup>a</sup>, Seok Man Hong<sup>b</sup>, Hyung Keun Kim<sup>b</sup>, Taehoon Kim<sup>b</sup>, Seung-min Chung<sup>a</sup>, Taeyoon Lee<sup>a</sup>, and Hyungjun Kim<sup>a\*</sup>

---

<sup>a</sup>School of Electrical and Electronic Engineering, Yonsei University, Seoul, 03722, Republic of Korea.

<sup>b</sup>SK hynix, 2091, Gyeongchung-daero, Bupal-eup, Icheon-si, Gyeonggi-do, Republic of Korea.

\* Corresponding author: [hyungjun@yonsei.ac.kr](mailto:hyungjun@yonsei.ac.kr)

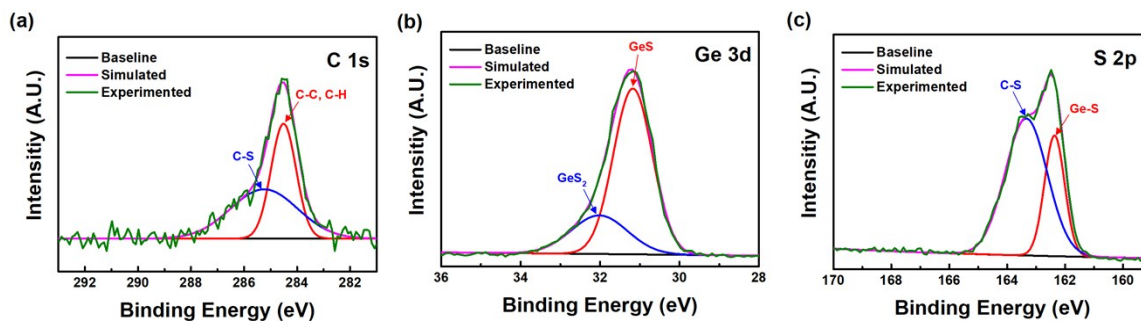

**Figure S1.** XPS results without surface etching of PE-ALD  $\text{Ge}_{1-x}\text{S}_x$  thin film at 70 °C (a) C 1s, (b) Ge 3d, and (c) S 2p. XPS results shows the binding energies of C-S bond located at approximately 285.5 eV and 163.7 eV in Figure S1(a) and Figure S1(c), respectively.<sup>1</sup> Moreover, in Figure S1(b), two peaks were observed with  $\text{GeS}_2$  (~32.2 eV) and GeS (~30.9 eV).<sup>2</sup> This XPS result supports the explanation for the compositional change of surfaces compared to the bulk, which is similarly shown in Figure 3 (b-d).

#### Reference

- 1 A. Vesel, J. Kovac, G. Primc, I. Junkar and M. Mozetic, *Materials*, 2016, 9, 95–108
- 2 H. Chen, C. Keiser, S. Du, H. J. Gao, P. Sutter and E. Sutter, *Phys. Chem. Chem. Phys.*, 2017, 19, 32473–32480.

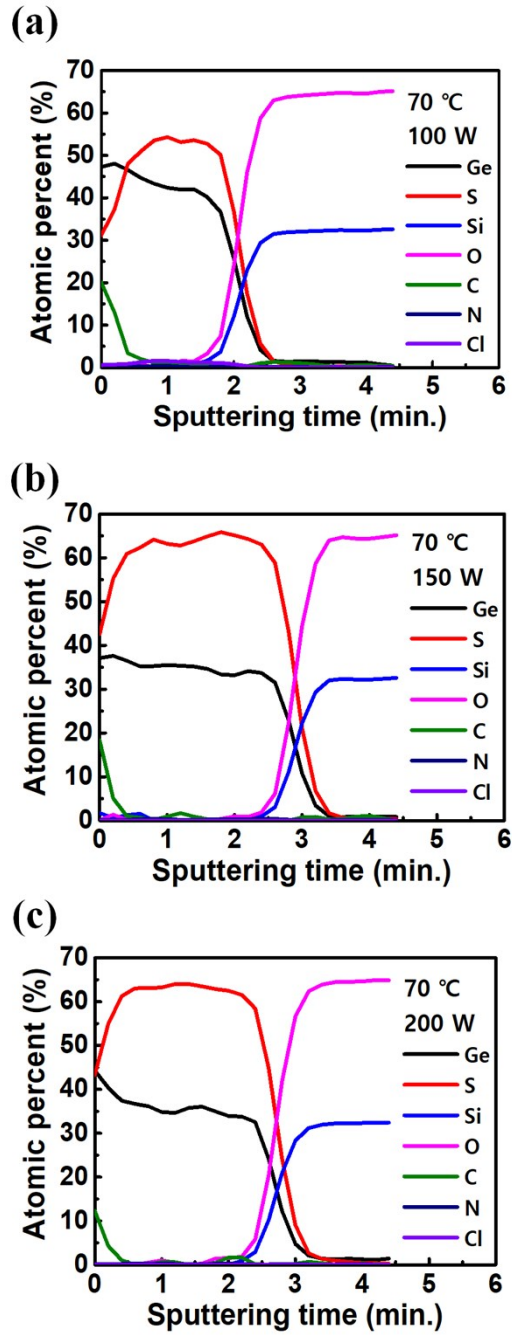

Figure S2. AES depth profile analysis of PE-ALD  $\text{Ge}_{1-x}\text{S}_x$  thin films as a function  $\text{H}_2\text{S}$  reactant plasma power at a growth temperature of 70 °C and: (a) 100 W; (b) 150 W; (c) 200 W.

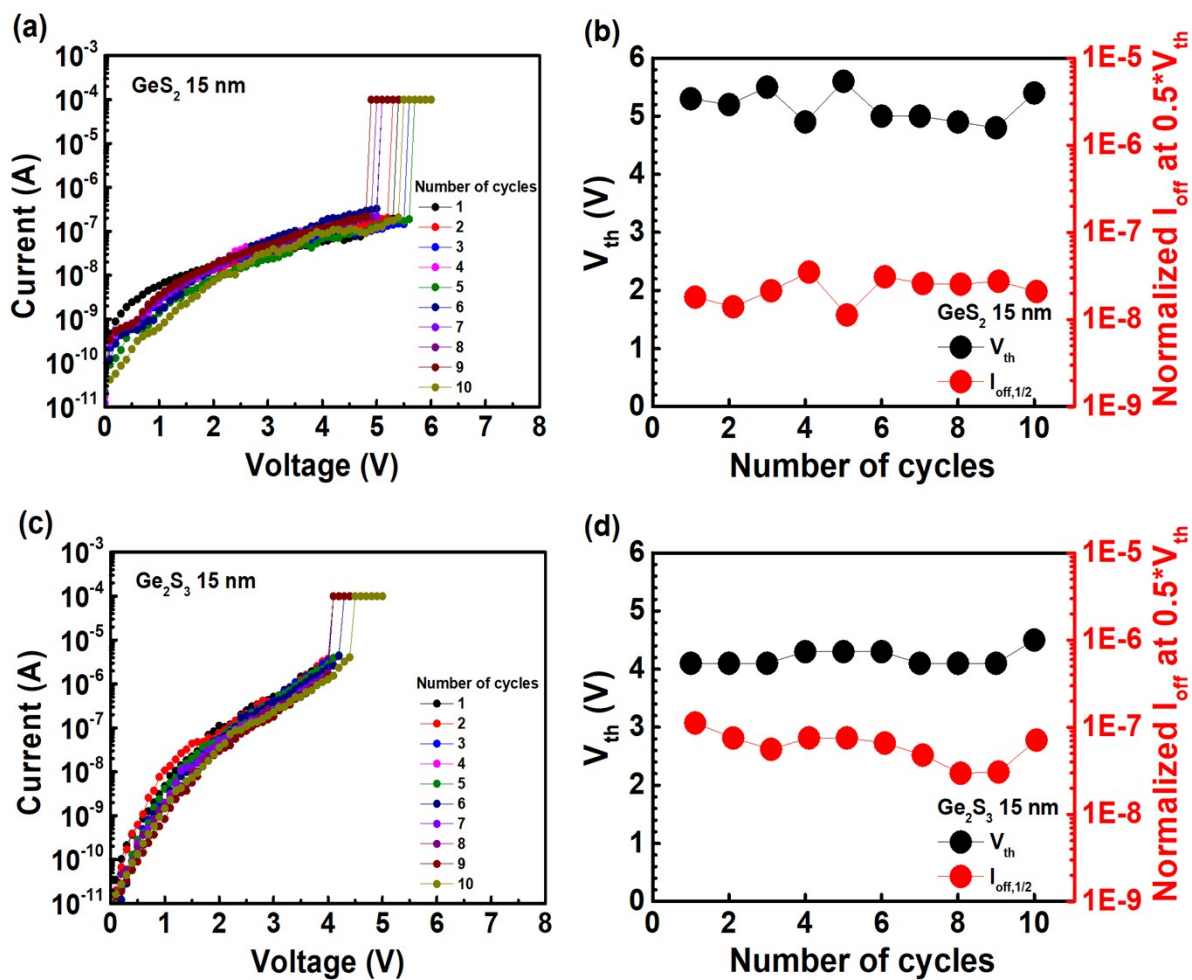

Figure S3. Repeatability characteristics of PE-ALD 15-nm-thick  $\text{GeS}_2$  and  $\text{Ge}_2\text{S}_3$  OTS devices: (a) cyclic DC I-V curves of  $\text{GeS}_2$ ; (b) repeatability of  $V_{th}$  and  $I_{off,1/2}$  of  $\text{GeS}_2$ ; (c) cyclic DC I-V curves of  $\text{Ge}_2\text{S}_3$ ; (d) repeatability of  $V_{th}$  and  $I_{off,1/2}$  of  $\text{Ge}_2\text{S}_3$
